# Supplementary material for: Protective Effect of Aframomum melegueta phenolics Against CCl4-Induced Rat Hepatocytes Damage; Role of Apoptosis and Pro-inflammatory Cytokines inhibition
Source: PubMed Central journal article supplement — Sci Rep. 2014 Jul 30;4:5880. doi: 10.1038/srep05880 (PMC5376205; doi:10.1038/srep05880), 2014-07-30
Supplement: srep05880-s1.pdf [file srep05880-s1.pdf]

## Supporting information

### **Protective Effect of *Aframomum melegueta* phenolics Against CCl<sub>4</sub>- Induced Rat Hepatocytes Damage; Role of Apoptosis and Pro- inflammatory Cytokines inhibition.**

Ali M. El-Halawany,<sup>1,2,\*</sup> Riham Salah El Dine<sup>2</sup>, Nesrine S. El Sayed<sup>3,4</sup> and Masao  
Hattori<sup>5</sup>

<sup>1</sup>*Faculty of Pharmacy, King Abdulaziz University, Jeddah 21589, Saudi Arabia*

<sup>2</sup>*Department of Pharmacognosy, Faculty of Pharmacy, Cairo University, 11562, Cairo,  
Egypt*

<sup>3</sup>*Department of Pharmacology & Toxicology, Faculty of pharmacy, Cairo University,  
11562, Cairo, Egypt*

<sup>4</sup>*Department of Pharmacology & Toxicology, Faculty of pharmacy & Biotechnology,  
German University in Cairo, 11835, Cairo, Egypt*

<sup>5</sup>*Institute of Natural Medicine, University of Toyama; 2630 Sugitani, Toyama 930-  
0194, Japan.*

| <b>Topic</b>                                                                                                                                                                                                                   | <b>page</b> |
|--------------------------------------------------------------------------------------------------------------------------------------------------------------------------------------------------------------------------------|-------------|
| <b>Effects of different extracts of <i>A. melegueta</i> and isolated compounds on alanine aminotransferase (ALT) activity induced by carbon tetrachloride using isolated suspended hepatocytes</b>                             | <b>3</b>    |
| <b>Effects of different extracts of <i>A. melegueta</i> and isolated compounds on glutathione (GSH) depletion induced by carbon tetrachloride using isolated suspended hepatocytes</b>                                         | <b>4</b>    |
| <b>Effects of different extracts of <i>A. melegueta</i> and isolated compounds on the formation of thiobarbituric acid reactive substances (TBARS) induced by carbon tetrachloride using isolated suspended hepatocytes</b>    | <b>5</b>    |
| <b>Effects of different extracts of <i>A. melegueta</i> and isolated compounds on the levels of tumor necrosis factor alpha (TNF-<math>\alpha</math>) induced by carbon tetrachloride using isolated suspended hepatocytes</b> | <b>6</b>    |
| <b>Effects of different extracts of <i>A. melegueta</i> and isolated compounds on the levels of interleukin 1-beta (IL-1<math>\beta</math>) induced by carbon tetrachloride using isolated suspended hepatocytes</b>           | <b>7</b>    |
| <b>Effects of different compounds on caspase-3 activity induced by carbon tetrachloride using isolated suspended hepatocytes</b>                                                                                               | <b>8</b>    |
| <b>Effects of different compounds on caspase-9 activity induced by carbon tetrachloride using isolated suspended hepatocytes</b>                                                                                               | <b>9</b>    |
| <b>NMR and Mass data of isolated compounds 1-3</b>                                                                                                                                                                             | <b>10</b>   |

**Table 1**

**Effects of different extracts of *A. melegueta* and isolated compounds on alanine aminotransferase (ALT) activity induced by carbon tetrachloride using isolated suspended hepatocytes**

| ALT(U/L)                                      |            |                         |                         |                         |                         |
|-----------------------------------------------|------------|-------------------------|-------------------------|-------------------------|-------------------------|
| Time after addition of CCl <sub>4</sub> (min) |            |                         |                         |                         |                         |
| Treatment                                     | 0          | 60                      | 90                      | 120                     | 180                     |
| Normal (DMSO)                                 | 39.29±2.02 | 41.26±2.41              | 40.67±1.62              | 38.08±2.11              | 41.29±1.72              |
| Control (CCl <sub>4</sub> )                   | 42.55±2.18 | 94.03±3.26*             | 95.22±6.62*             | 98.33±4.26*             | 119.24±6.88*            |
| Curcumin (1 µM)                               | 38.32±2.33 | 42.82±2.81 <sup>@</sup> | 44.31±3.09 <sup>@</sup> | 48.63±2.81 <sup>@</sup> | 50.54±2.72 <sup>@</sup> |
| Methanol extract                              | 41.26±1.80 | 43.44±3.18 <sup>@</sup> | 48.48±4.88 <sup>@</sup> | 43.01±4.67 <sup>@</sup> | 49.12±3.11 <sup>@</sup> |
| Chloroform extract                            | 40.49±2.16 | 46.21±3.61 <sup>@</sup> | 49.23±4.19 <sup>@</sup> | 51.01±3.81 <sup>@</sup> | 45.81±3.61 <sup>@</sup> |
| Hexane extract                                | 48.17±2.84 | 51.39±2.83 <sup>@</sup> | 58.32±4.66 <sup>@</sup> | 58.67±4.22 <sup>@</sup> | 53.91±3.56 <sup>@</sup> |
| Ethylacetate extract                          | 39.18±2.96 | 78.47±2.05*             | 81.06±3.55*             | 79.78±3.82*             | 73.67±3.98*             |
| Butanol extract                               | 40.23±3.01 | 71.47±2.93*             | 79.12±3.15*             | 80.64±3.09*             | 75.67±4.01*             |
| 1                                             | 41.33±2.42 | 47.55±3.46 <sup>@</sup> | 49.77±3.82 <sup>@</sup> | 53.48±3.76 <sup>@</sup> | 46.31±3.83 <sup>@</sup> |
| 2                                             | 40.22±3.11 | 88.65±2.13*             | 87.29±3.19*             | 76.09±4.03*             | 75.32±3.88*             |
| 3                                             | 46.72±2.95 | 47.17±3.90 <sup>@</sup> | 49.66±4.01 <sup>@</sup> | 50.43±3.75 <sup>@</sup> | 48.59±3.72 <sup>@</sup> |
| 4                                             | 39.26±1.80 | 41.44±2.48 <sup>@</sup> | 48.48±4.88 <sup>@</sup> | 43.01±4.67 <sup>@</sup> | 49.12±3.11 <sup>@</sup> |
| 5                                             | 48.17±2.84 | 50.69±2.88 <sup>@</sup> | 53.52±4.29 <sup>@</sup> | 52.07±4.13 <sup>@</sup> | 52.01±3.70 <sup>@</sup> |
| 6                                             | 39.18±2.96 | 73.47±2.05*             | 82.06±3.55*             | 79.78±3.82*             | 77.12±4.02*             |
| 7                                             | 43.85±2.99 | 77.14±3.23*             | 80.66±3.56*             | 89.54±4.26*             | 88.22±4.42*             |
| 8                                             | 47.15±2.91 | 55.39±2.98 <sup>@</sup> | 54.32±5.01 <sup>@</sup> | 50.67±4.22 <sup>@</sup> | 51.19±3.01 <sup>@</sup> |
| 9                                             | 42.55±2.33 | 43.79±2.75 <sup>@</sup> | 49.17±3.90 <sup>@</sup> | 45.61±3.76 <sup>@</sup> | 49.95±3.84 <sup>@</sup> |

Hepatocyte suspensions ( $5 \times 10^6$  cells/ml) in Krebs-Henseleit buffer were maintained at 37°C under an atmosphere of 95% O<sub>2</sub> and 5% CO<sub>2</sub>. The cells were incubated with the test compounds (dissolved in DMSO) for 30 min. prior to the addition of the hepatotoxic CCl<sub>4</sub>. Carbon tetrachloride was added to the incubation media in all groups at a concentration of 5 mM, except in the normal group where only the vehicle DMSO was added.

Each value represents the mean of six separate determinations ± SE of the mean.

\* Significantly different from the normal group p<0.05.

<sup>@</sup>Significantly different from control group p<0.05.

**Table 2**

**Effects of different extracts of *A. melegueta* and isolated compounds on glutathione (GSH) depletion induced by carbon tetrachloride using isolated suspended hepatocytes**

| GSH(nmol/10 <sup>6</sup> cells)               |            |             |             |               |               |
|-----------------------------------------------|------------|-------------|-------------|---------------|---------------|
| Time after addition of CCl <sub>4</sub> (min) |            |             |             |               |               |
| Treatment                                     | 0          | 60          | 90          | 120           | 180           |
| Normal (DMSO)                                 | 61.45±5.05 | 59.07±4.15  | 55.67±4.45  | 54.55±4.23    | 53.49±4.59    |
| Control (CCl <sub>4</sub> )                   | 62.42±4.93 | 22.12±2.90  | 19.67±2.85* | 17.96±1.05*   | 13.09±0.90*   |
| Curcumin (1 μM)                               | 60.25±4.78 | 54.13±2.24  | 49.67±3.02@ | 47.09±3.06@   | 43.91±3.89@   |
| Methanol extract                              | 61.08±4.64 | 53.55±3.38  | 50.32±3.68@ | 48.42±3.41@   | 46.02±3.88@   |
| Chloroform extract                            | 59.67±4.02 | 49.99±3.98  | 43.19±3.27@ | 41.46±3.24@i  | 37.29±3.22@   |
| Hexane extract                                | 60.23±4.35 | 48.67±3.06  | 40.67±3.45@ | 39.28±2.69* @ | 36.71±1.89* @ |
| Ethyl acetate extract                         | 60.37±2.22 | 27.67±2.11* | 29.67±2.45* | 25.40±1.70*   | 23.94±1.93*   |
| Butanol extract                               | 58.24±2.47 | 23.67±2.91* | 24.67±1.74* | 21.40±1.48*   | 19.94±1.88*   |
| 1                                             | 59.11±3.86 | 48.52±3.78  | 50.29±3.44@ | 51.33±3.16@   | 51.29±3.41@   |
| 2                                             | 58.19±3.45 | 27.53±2.54* | 29.71±2.32* | 28.37±1.82*   | 25.71±1.98*   |
| 3                                             | 58.67±2.29 | 23.51±2.79* | 24.72±1.74* | 21.16±1.44*   | 19.94±1.58*   |
| 4                                             | 61.11±4.34 | 44.13±2.64  | 48.52±2.15@ | 50.36±3.44@   | 49.91±3.89@   |
| 5                                             | 57.81±4.66 | 48.67±3.12  | 47.22±3.18@ | 49.75±2.42* @ | 46.71±2.02* @ |
| 6                                             | 58.43±2.61 | 28.42±2.61* | 30.67±2.68* | 32.40±1.66*   | 31.48±1.93*   |
| 7                                             | 57.44±2.57 | 26.32±3.01* | 21.43±1.82* | 20.62±1.73*   | 20.73±1.91*   |
| 8                                             | 60.67±4.02 | 50.99±3.32  | 41.19±3.54@ | 40.46±3.84@   | 45.29±3.66@   |
| 9                                             | 57.27±4.59 | 49.18±3.22  | 46.81±3.58@ | 42.28±2.55* @ | 41.17±2.47* @ |

Hepatocyte suspensions (5x10<sup>6</sup> cells/ml) in Krebs-Henseleit buffer were maintained at 37°C under an atmosphere of 95% O<sub>2</sub> and 5% CO<sub>2</sub>. The cells were incubated with the different extracts (dissolved in DMSO) for 30 min. prior to the addition of the hepatotoxic CCL<sub>4</sub>. Carbon tetrachloride was added to the incubation media in all groups at a concentration of 5 mM, except in the normal group where only the vehicle DMSO was added.

Each value represents the mean of six separate determinations ± SE of the mean.

\* Significantly different from the normal group p<0.05.

@Significantly different from control group p<0.05.

**Table 3**

**Effects of different extracts of *A. melegueta* and isolated compounds on the formation of thiobarbituric acid reactive substances (TBARS) induced by carbon tetrachloride using isolated suspended hepatocytes**

| <b>TBARS (nmol/10<sup>6</sup> cells)</b>            |             |               |               |               |               |
|-----------------------------------------------------|-------------|---------------|---------------|---------------|---------------|
| <b>Time after addition of CCl<sub>4</sub> (min)</b> |             |               |               |               |               |
| Treatment                                           | 0           | 60            | 90            | 120           | 180           |
| Normal (DMSO)                                       | 0.036±0.006 | 0.043±0.005   | 0.039±0.005   | 0.040±0.004   | 0.042±0.006   |
| Control (CCl <sub>4</sub> )                         | 0.038±0.005 | 0.197±0.032*  | 0.287±0.040*  | 0.284±0.047*  | 0.301±0.058*  |
| Curcumin (1µM)                                      | 0.036±0.003 | 0.124±0.024@  | 0.189±0.051*@ | 0.205±0.053*@ | 0.183±0.008*@ |
| Methanol extract                                    | 0.036±0.004 | 0.063±0.013@  | 0.107±0.026*@ | 0.099±0.032*@ | 0.086±0.009*@ |
| Chloroform extract                                  | 0.042±0.008 | 0.085±0.015*  | 0.093±0.025*  | 0.090±0.031*@ | 0.096±0.016*@ |
| Hexane extract                                      | 0.041±0.006 | 0.110±0.028*@ | 0.132±0.044*@ | 0.134±0.060*@ | 0.119±0.012*@ |
| Ethyl acetate extract                               | 0.036±0.003 | 0.124±0.024*  | 0.189±0.051*  | 0.225±0.053*  | 0.283±0.008*  |
| Butanol extract                                     | 0.037±0.002 | 0.214±0.039*  | 0.229±0.048*  | 0.246±0.061*  | 0.267±0.0063* |
| 1                                                   | 0.038±0.006 | 0.102±0.032*@ | 0.141±0.051*@ | 0.121±0.059*@ | 0.099±0.014*@ |
| 2                                                   | 0.042±0.008 | 0.155±0.020*  | 0.223±0.068*  | 0.290±0.081*  | 0.288±0.069*  |
| 3                                                   | 0.037±0.002 | 0.204±0.043*  | 0.234±0.048*  | 0.233±0.061*  | 0.269±0.063*  |
| 4                                                   | 0.036±0.004 | 0.165±0.013*  | 0.217±0.026*  | 0.263±0.071*  | 0.286±0.078*  |
| 5                                                   | 0.041±0.007 | 0.110±0.028*@ | 0.132±0.044*@ | 0.134±0.060*@ | 0.119±0.012*@ |
| 6                                                   | 0.036±0.003 | 0.224±0.024*  | 0.247±0.051*  | 0.259±0.053*  | 0.291±0.081*  |
| 7                                                   | 0.041±0.006 | 0.156±0.052*  | 0.198±0.067*  | 0.224±0.089*  | 0.232±0.057*  |
| 8                                                   | 0.038±0.004 | 0.075±0.016@  | 0.115±0.028*@ | 0.097±0.029*@ | 0.074±0.010*@ |
| 9                                                   | 0.036±0.003 | 0.069±0.015@  | 0.121±0.022*@ | 0.082±0.032*@ | 0.066±0.011*@ |

Hepatocyte suspensions (5x10<sup>6</sup> cells/ml) in Krebs-Henseleit buffer were maintained at 37°C under an atmosphere of 95% O<sub>2</sub> and 5% CO<sub>2</sub>. The cells were incubated with the different extracts (dissolved in DMSO) for 30 min. prior to the addition of the hepatotoxic CCL<sub>4</sub>. Carbon tetrachloride was added to the incubation media in all groups at a concentration of 5 mM, except in the normal group where only the vehicle DMSO was added.

Each value represents the mean of six separate determinations ± SE of the mean.

\* Significantly different from the normal group p<0.05.

@Significantly different from control group p<0.05.

**Table 4**

**Effects of different extracts of *A. melegueta* and isolated compounds on the levels of tumor necrosis factor alpha (TNF- $\alpha$ ) induced by carbon tetrachloride using isolated suspended hepatocytes**

| TNF- $\alpha$ (pg/ml)                         |             |               |                |                |                |
|-----------------------------------------------|-------------|---------------|----------------|----------------|----------------|
| Time after addition of CCl <sub>4</sub> (min) |             |               |                |                |                |
| Treatment                                     | 0           | 60            | 90             | 120            | 180            |
| Normal (DMSO)                                 | 102.25±9.32 | 101.45±6.16   | 98.12±6.77     | 96.18±7.56     | 92.25±3.56     |
| Control(CCl <sub>4</sub> )                    | 99.34±6.61  | 230.75±10.12* | 245.75±11.01*  | 261.75±13.98*  | 251.75±11.54*  |
| Curcumin (1 $\mu$ M)                          | 98.75±7.16  | 129.02±6.35@  | 137.02±9.44* @ | 148.02±1.28* @ | 158.02±7.95* @ |
| Methanol extract                              | 98.75±7.16  | 129.02±6.35*  | 117.02±9.44* @ | 128.02±5.28* @ | 141.02±7.95* @ |
| Chloroform extract                            | 96.11±7.55  | 132.34±9.32@  | 128.24±9.08@   | 146.34±1.28@   | 155.34±9.84@   |
| Hexane extract                                | 103.17±5.98 | 145.02±7.55*  | 139.02±8.37* @ | 146.02±1.28* @ | 154.02±9.28* @ |
| Ethyl acetate extract                         | 101.22±8.46 | 217.80±8.23*  | 212.40±10.82*  | 214.80±12.43*  | 220.80±10.22*  |
| Butanol extract                               | 99.55±6.14  | 201.02±6.15*  | 189.02±7.24*   | 210.02±9.28*   | 233.06±8.05*   |
| 1                                             | 103.17±5.98 | 145.02±7.55*  | 139.02±8.37* @ | 146.02±1.28* @ | 154.02±9.28* @ |
| 2                                             | 103.56±6.82 | 237.11±9.81*  | 200.55±11.01*  | 216.80±12.27*  | 232.75±11.18*  |
| 3                                             | 101.22±8.46 | 217.80±8.23*  | 212.40±10.82*  | 214.80±12.43*  | 220.80±10.22*  |
| 4                                             | 99.34±6.61  | 230.35±10.12* | 245.61±11.01*  | 261.95±13.98*  | 251.14±13.54*  |
| 5                                             | 98.75±7.16  | 129.87±6.35*  | 117.38±9.44* @ | 128.25±5.28* @ | 141.33±7.95* @ |
| 6                                             | 99.55±6.14  | 201.02±6.15*  | 189.02±7.24*   | 210.02±9.28*   | 233.06±8.05*   |
| 7                                             | 99.34±6.61  | 196.66±10.41* | 206.37±12.07*  | 223.49±13.32*  | 225.66±13.11*  |
| 8                                             | 100.02±6.46 | 116.58±6.13*  | 124.72±8.19* @ | 130.66±5.15* @ | 138.21±8.03* @ |
| 9                                             | 96.11±7.55  | 132.34±9.32@  | 128.24±9.08@   | 146.34±1.28@   | 155.34±9.84@   |

Hepatocyte suspensions ( $5 \times 10^6$  cells/ml) in Krebs-Henseleit buffer were maintained at 37°C under an atmosphere of 95% O<sub>2</sub> and 5% CO<sub>2</sub>. The cells were incubated with the different extracts (dissolved in DMSO) for 30 min. prior to the addition of the hepatotoxic CCl<sub>4</sub>. Carbon tetrachloride was added to the incubation media in all groups at a concentration of 5 mM, except in the normal group where only the vehicle DMSO was added.

Each value represents the mean of six separate determinations  $\pm$  SE of the mean.

\* Significantly different from the normal group  $p < 0.05$ .

@Significantly different from control group  $p < 0.05$ .

**Table 5**

**Effects of different extracts of *A. melegueta* and isolated compounds on the levels of interleukin 1-beta (IL-1 $\beta$ ) induced by carbon tetrachloride using isolated suspended hepatocytes**

| <b>IL-1<math>\beta</math> (pg/ml)</b>              |                  |                    |                    |                    |                    |
|----------------------------------------------------|------------------|--------------------|--------------------|--------------------|--------------------|
| <b>Time after addition of CCl<sub>4</sub>(min)</b> |                  |                    |                    |                    |                    |
| <b>Treatment</b>                                   | <b>0</b>         | <b>60</b>          | <b>90</b>          | <b>120</b>         | <b>180</b>         |
| Normal(DMSO)                                       | 34.12 $\pm$ 1.69 | 34.15 $\pm$ 1.53   | 51.14 $\pm$ 1.72   | 43.44 $\pm$ 9.42   | 42.22 $\pm$ 2.42   |
| Control(CCl <sub>4</sub> )                         | 35.22 $\pm$ 2.56 | 205.34 $\pm$ 8.56* | 191.34 $\pm$ 6.56* | 159.34 $\pm$ 7.88* | 167.54 $\pm$ 9.17* |
| Curcumin (1 $\mu$ M)                               | 32.66 $\pm$ 2.87 | 96.88 $\pm$ 5.09*@ | 95.28 $\pm$ 4.01*@ | 74.33 $\pm$ 7.51@  | 61.54 $\pm$ 4.02@  |
| Methanol extract                                   | 35.18 $\pm$ 1.98 | 82.23 $\pm$ 4.01*@ | 90.68 $\pm$ 4.14*@ | 81.23 $\pm$ 5.13@  | 48.91 $\pm$ 2.42@  |
| Chloroform extract                                 | 32.66 $\pm$ 2.87 | 96.88 $\pm$ 5.09*@ | 95.28 $\pm$ 4.01*@ | 74.33 $\pm$ 7.51@  | 61.54 $\pm$ 9.06@  |
| Hexane extract                                     | 35.23 $\pm$ 2.56 | 86.28 $\pm$ 4.77*@ | 97.19 $\pm$ 4.58*@ | 80.37 $\pm$ 6.16@  | 67.91 $\pm$ 4.02@  |
| Ethyl acetate extract                              | 35.78 $\pm$ 2.63 | 191.12 $\pm$ 9.01* | 150.68 $\pm$ 5.54* | 125.16 $\pm$ 8.43* | 119.21 $\pm$ 7.51* |
| Butanol extract                                    | 34.94 $\pm$ 2.42 | 188.59 $\pm$ 5.87* | 178.48 $\pm$ 5.24* | 132.46 $\pm$ 5.51* | 118.38 $\pm$ 3.92* |
| 1                                                  | 35.17 $\pm$ 3.01 | 91.54 $\pm$ 5.27*@ | 90.28 $\pm$ 4.58*@ | 77.65 $\pm$ 7.53@  | 60.89 $\pm$ 4.11@  |
| 2                                                  | 37.67 $\pm$ 2.65 | 181.48 $\pm$ 9.68* | 167.12 $\pm$ 5.79* | 148.19 $\pm$ 8.64* | 139.62 $\pm$ 8.04* |
| 3                                                  | 35.78 $\pm$ 2.63 | 178.65 $\pm$ 9.32* | 145.68 $\pm$ 6.55* | 139.16 $\pm$ 8.03* | 131.52 $\pm$ 6.63* |
| 4                                                  | 38.33 $\pm$ 2.68 | 171.75 $\pm$ 5.88* | 180.16 $\pm$ 5.85* | 170.18 $\pm$ 6.77* | 159.44 $\pm$ 6.02* |
| 5                                                  | 35.55 $\pm$ 2.85 | 87.39 $\pm$ 4.86*@ | 97.17 $\pm$ 4.47*@ | 82.30 $\pm$ 6.43@  | 68.91 $\pm$ 4.49@  |
| 6                                                  | 35.16 $\pm$ 1.98 | 186.73 $\pm$ 4.26* | 193.16 $\pm$ 4.65* | 161.23 $\pm$ 5.13* | 148.91 $\pm$ 3.82* |
| 7                                                  | 34.55 $\pm$ 2.87 | 168.12 $\pm$ 5.63* | 156.48 $\pm$ 5.19* | 142.88 $\pm$ 6.11* | 128.33 $\pm$ 3.89* |
| 8                                                  | 32.18 $\pm$ 2.77 | 86.33 $\pm$ 5.54*@ | 97.45 $\pm$ 4.60*@ | 84.65 $\pm$ 7.57@  | 71.14 $\pm$ 4.54@  |
| 9                                                  | 33.98 $\pm$ 3.06 | 81.22 $\pm$ 4.34*@ | 90.57 $\pm$ 4.58*@ | 80.37 $\pm$ 6.88@  | 77.67 $\pm$ 4.51@  |

Hepatocyte suspensions ( $5 \times 10^6$  cells/ml) in Krebs-Henseleit buffer were maintained at 37°C under an atmosphere of 95% O<sub>2</sub> and 5% CO<sub>2</sub>. The cells were incubated with the test compound (dissolved in DMSO) for 30 min. prior to the addition of the hepatotoxic CCL<sub>4</sub>. Carbon tetrachloride was added to the incubation media in all groups at a concentration of 5 mM, except in the normal group where only the vehicle DMSO was added.

Each value represents the mean of six separate determinations  $\pm$  SE of the mean.

\* Significantly different from the normal group  $p < 0.05$ .

@Significantly different from control group  $p < 0.05$ .

**Table 6**

**Effects of different compounds on caspase-3 activity induced by carbon tetrachloride using isolated suspended hepatocytes**

| <b>Caspase-3 activity(U/well)</b>                   |                    |                    |                    |                      |                    |
|-----------------------------------------------------|--------------------|--------------------|--------------------|----------------------|--------------------|
| <b>Time after addition of CCl<sub>4</sub> (min)</b> |                    |                    |                    |                      |                    |
| <b>Treatment</b>                                    | <b>0</b>           | <b>60</b>          | <b>90</b>          | <b>120</b>           | <b>180</b>         |
| <b>Normal (DMSO)</b>                                | <b>0.65±0.049</b>  | <b>0.63±0.032</b>  | <b>0.69±0.045</b>  | <b>0.68±0.053</b>    | <b>0.72±0.036</b>  |
| <b>Control (CCl<sub>4</sub>)</b>                    | <b>1.37±0.065*</b> | <b>1.39±0.051*</b> | <b>1.51±0.049*</b> | <b>1.53±0.058*</b>   | <b>1.68±0.061*</b> |
| <b>Curcumin (1 μM)</b>                              | <b>0.63±0.039@</b> | <b>0.66±0.042@</b> | <b>0.69±0.048@</b> | <b>0.75±0.072@</b>   | <b>0.81±0.069@</b> |
| <b>1</b>                                            | <b>0.68±0.053@</b> | <b>0.72±0.042@</b> | <b>0.74±0.071@</b> | <b>0.81±0.059@</b>   | <b>0.89±0.044@</b> |
| <b>2</b>                                            | <b>1.32±0.059*</b> | <b>1.35±0.070*</b> | <b>1.43±0.068*</b> | <b>1.49±0.071*</b>   | <b>1.58±0.079*</b> |
| <b>3</b>                                            | <b>1.37±0.042</b>  | <b>1.54±0.043*</b> | <b>1.64±0.068*</b> | <b>1.73±0.051*</b>   | <b>1.79±0.049*</b> |
| <b>4</b>                                            | <b>1.25±0.089*</b> | <b>1.26±0.063*</b> | <b>1.37±0.086*</b> | <b>1.43±0.091*</b>   | <b>1.56±0.072*</b> |
| <b>5</b>                                            | <b>0.60±0.027@</b> | <b>0.69±0.058@</b> | <b>0.72±0.084@</b> | <b>0.84±0.068@</b>   | <b>0.91±0.012@</b> |
| <b>6</b>                                            | <b>1.36±0.033</b>  | <b>1.44±0.054*</b> | <b>1.47±0.051*</b> | <b>1.59±0.063*</b>   | <b>1.91±0.081*</b> |
| <b>7</b>                                            | <b>1.41±0.063*</b> | <b>1.46±0.052*</b> | <b>1.48±0.077*</b> | <b>1.54±0.069*</b>   | <b>1.58±0.067*</b> |
| <b>8</b>                                            | <b>0.59±0.049@</b> | <b>0.61±0.036@</b> | <b>0.65±0.028@</b> | <b>0.77±0.059@</b>   | <b>0.84±0.070@</b> |
| <b>9</b>                                            | <b>0.71±0.003@</b> | <b>0.75±0.015@</b> | <b>0.81±0.022@</b> | <b>0.82±0.032* @</b> | <b>0.86±0.011@</b> |

Hepatocyte suspensions ( $5 \times 10^6$  cells/ml) in Krebs-Henseleit buffer were maintained at 37°C under an atmosphere of 95% O<sub>2</sub> and 5% CO<sub>2</sub>. The cells were incubated with three concentrations of the test compound curcumin (dissolved in DMSO) for 30 min. prior to the addition of the hepatotoxic CCL<sub>4</sub>. Carbon tetrachloride was added to the incubation media in all groups at a concentration of 5 mM, except in the normal group where only the vehicle DMSO was added.

Each value represents the mean of six separate determinations ± SE of the mean.

\* Significantly different from the normal group p<0.05.

@Significantly different from control group p<0.05.



**Table 7**

**Effects of different compounds on caspase-9 activity induced by carbon tetrachloride using isolated suspended hepatocytes**

| <b>Caspase-9 activity(U/well)</b>                   |             |             |             |             |             |
|-----------------------------------------------------|-------------|-------------|-------------|-------------|-------------|
| <b>Time after addition of CCl<sub>4</sub> (min)</b> |             |             |             |             |             |
| <b>Treatment</b>                                    | <b>0</b>    | <b>60</b>   | <b>90</b>   | <b>120</b>  | <b>180</b>  |
| Normal (DMSO)                                       | 0.49±0.059  | 0.51±0.054  | 0.55±0.062  | 0.60±0.53   | 0.59±0.061  |
| Control (CCl <sub>4</sub> )                         | 1.02±0.032* | 1.22±0.031* | 1.41±0.039* | 1.49±0.048* | 1.68±0.061* |
| Curcumin (1 µM)                                     | 0.56±0.072@ | 0.60±0.054@ | 0.63±0.055@ | 0.68±0.071@ | 0.70±0.081@ |
| 1                                                   | 0.63±0.045@ | 0.62±0.042@ | 0.54±0.061@ | 0.61±0.069@ | 0.69±0.074@ |
| 2                                                   | 1.15±0.030* | 1.15±0.033* | 1.48±0.058* | 1.39±0.071* | 1.28±0.056* |
| 3                                                   | 1.19±0.042  | 1.24±0.073* | 1.34±0.038* | 1.43±0.061* | 1.69±0.068* |
| 4                                                   | 1.17±0.041* | 1.19±0.023* | 1.21±0.022* | 1.23±0.031* | 1.29±0.028* |
| 5                                                   | 0.41±0.055@ | 0.40±0.032@ | 0.52±0.053@ | 0.64±0.040@ | 0.69±0.072@ |
| 6                                                   | 1.03±0.027  | 1.24±0.034* | 1.27±0.051* | 1.59±0.083* | 1.58±0.092* |
| 7                                                   | 1.15±0.042* | 1.16±0.082* | 1.19±0.044* | 1.24±0.091* | 1.32±0.075* |
| 8                                                   | 0.38±0.014@ | 0.65±0.036@ | 0.62±0.048@ | 0.67±0.069@ | 0.74±0.060@ |
| 9                                                   | 0.36±0.013@ | 0.49±0.025@ | 0.51±0.052@ | 0.62±0.082@ | 0.66±0.071@ |

Hepatocyte suspensions ( $5 \times 10^6$  cells/ml) in Krebs-Henseleit buffer were maintained at 37°C under an atmosphere of 95% O<sub>2</sub> and 5% CO<sub>2</sub>. The cells were incubated with three concentrations of the test compound curcumin (dissolved in DMSO) for 30 min. prior to the addition of the hepatotoxic CCl<sub>4</sub>. Carbon tetrachloride was added to the incubation media in all groups at a concentration of 5 mM, except in the normal group where only the vehicle DMSO was added.

Each value represents the mean of six separate determinations ± SE of the mean.

\* Significantly different from the normal group p<0.05.

@Significantly different from control group p<0.05.

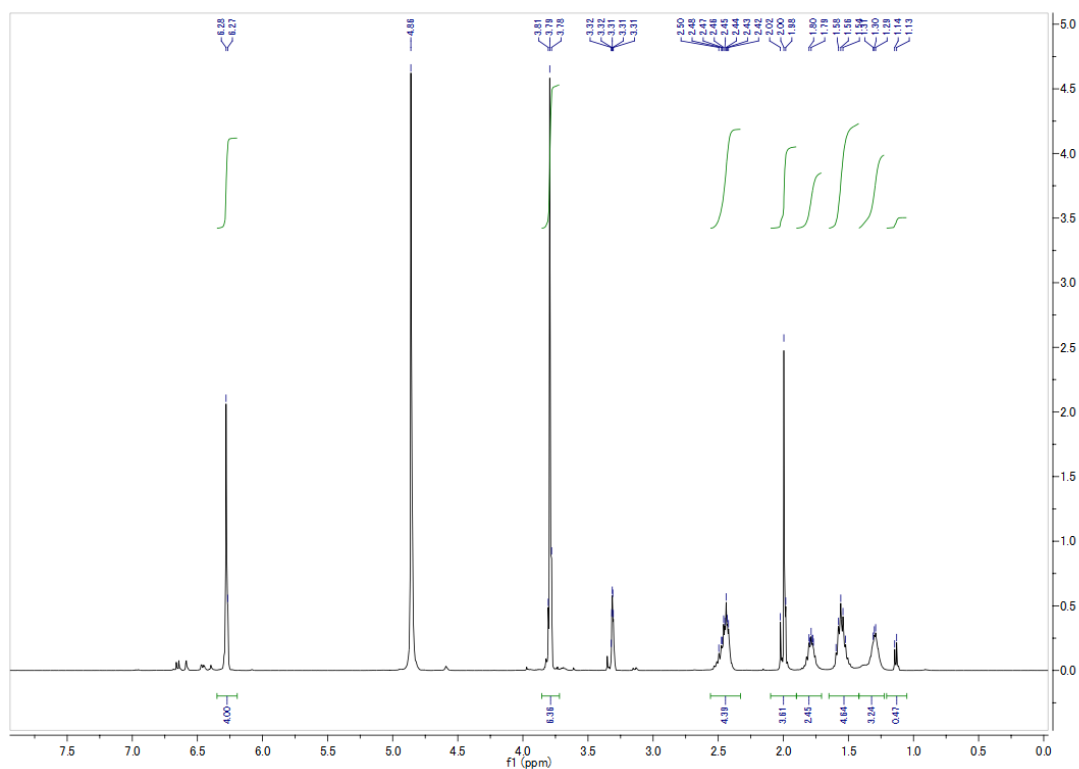

**<sup>1</sup>H-NMR chart of compound 1(CD<sub>3</sub>OD)**

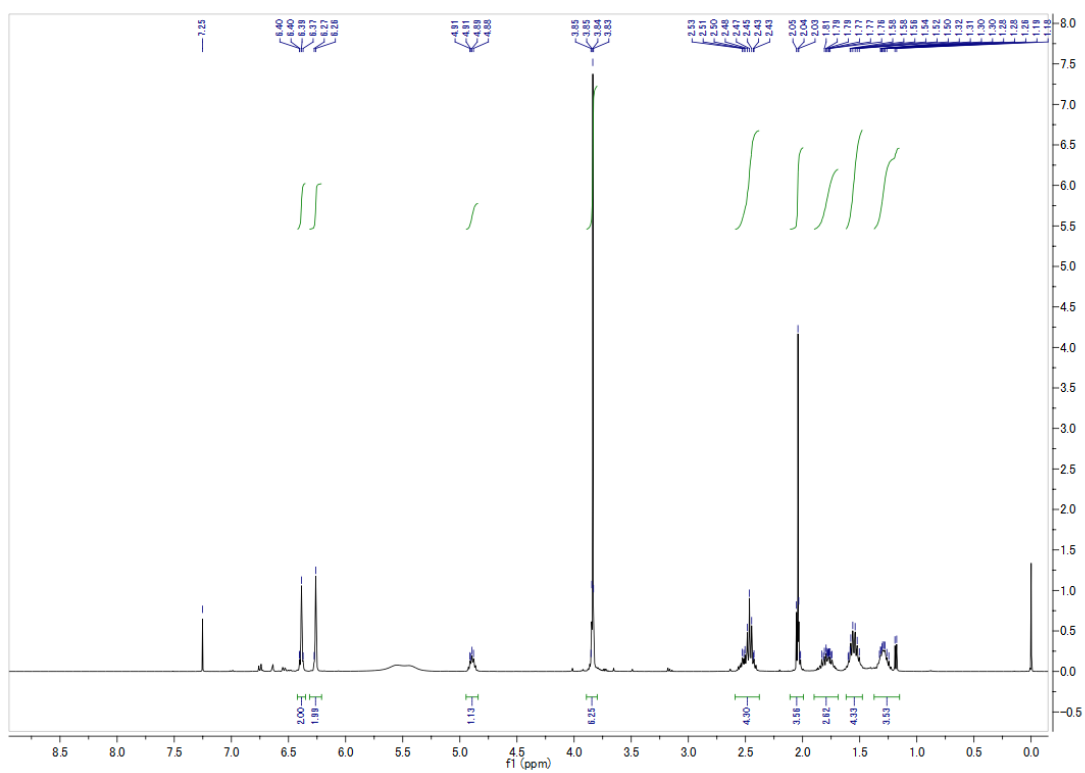

**<sup>1</sup>H-NMR of compound 1 (CDCl<sub>3</sub>)**

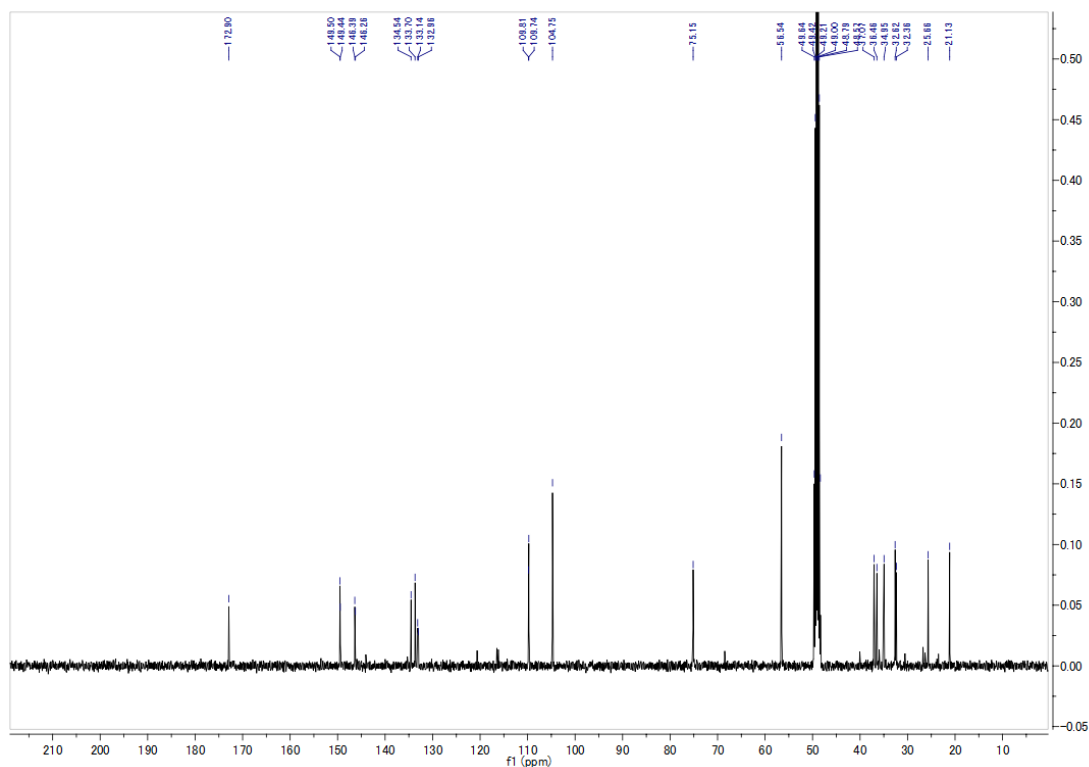

### 13C-NMR of compound 1 (CD3OD)

### HREIMS of compound 1

Sample: 9-5-8

Instrument: JEOL GCmate

Inlet: Direct Probe

Ionization mode: EI+

Scan: 20

R.T.: 5.23

Base: m/z 434; 100%FS TIC: 50630352

#Ions: 1743

Selected Isotopes :  $\text{H C}_{9-23} \text{O}_{0-8}$

Error Limit : 10 mmu

| <u>Measured Mass</u> | <u>% Base</u> | <u>Formula</u>                         | <u>Calculated Mass</u> | <u>Error</u> |
|----------------------|---------------|----------------------------------------|------------------------|--------------|
| 434.1874             | 100.0%        | $\text{C}_{23}\text{H}_{30}\text{O}_8$ | 434.1941               | -6.7         |

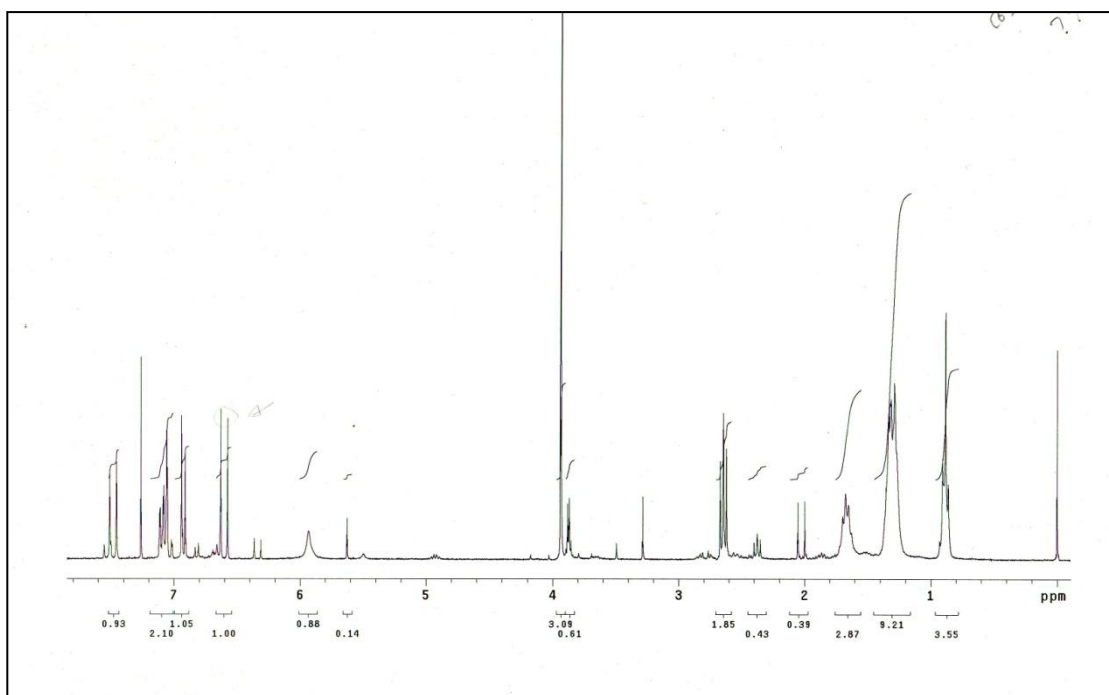

<sup>1</sup>H-NMR chart of compound 2

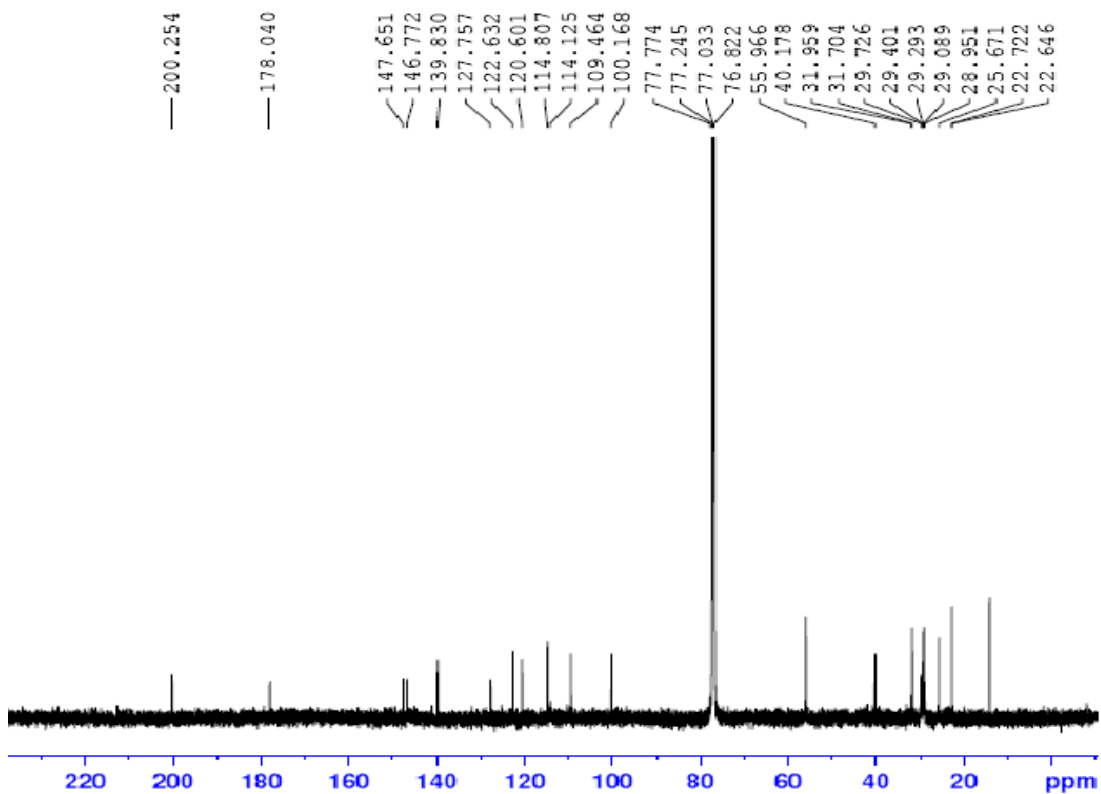

<sup>13</sup>C-NMR chart of compound 2

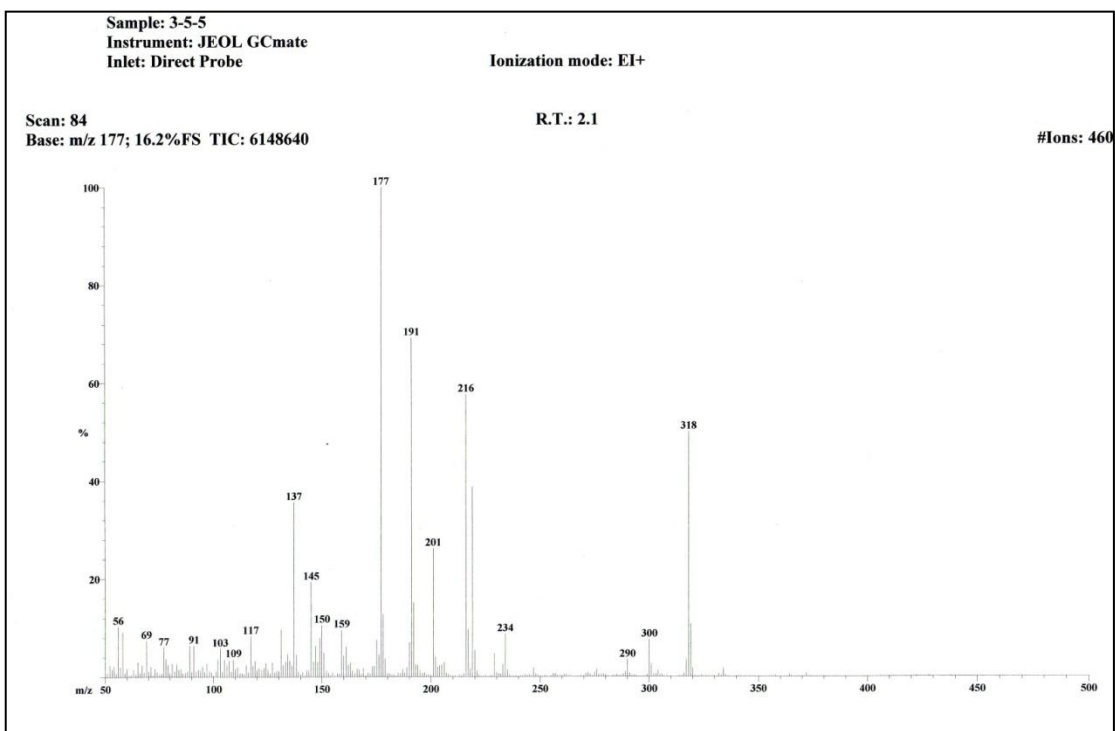

**EI-MS of compound 2**

Sample: 3-5-5 )  
Instrument: JEOL GCmate  
Inlet: Direct Probe

Ionization mode: EI+

Scan: 13  
Base: m/z 177; 100%FS TIC: 39500032

R.T.: 2.05

#Ions: 1029

Selected Isotopes : H C<sub>0-19</sub> O<sub>0-4</sub>

Error Limit : 10 mmu

| <u>Measured Mass</u> | <u>% Base</u> | <u>Formula</u>                                 | <u>Calculated Mass</u> | <u>Error</u> |
|----------------------|---------------|------------------------------------------------|------------------------|--------------|
| 318.1800             | 41.7%         | C <sub>19</sub> H <sub>26</sub> O <sub>4</sub> | 318.1831               | -3.1         |

**HREIMS of compound 2**

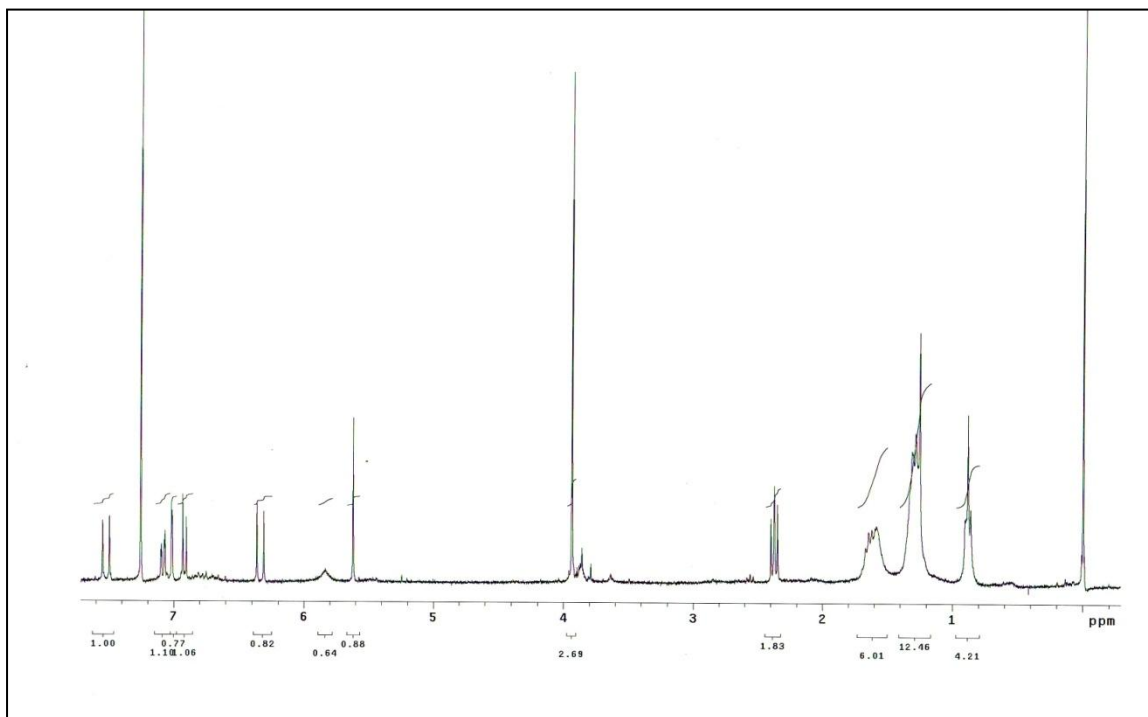

<sup>1</sup>H-NMR of compound 3

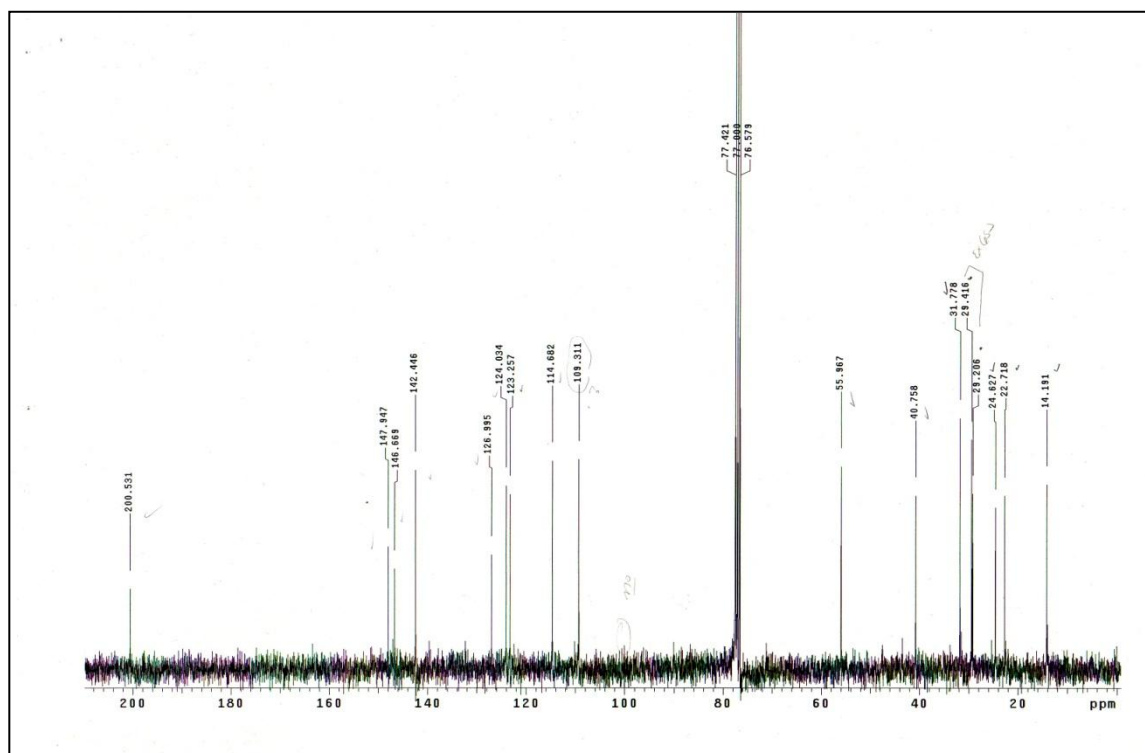

<sup>13</sup>C-NMR of compound 3

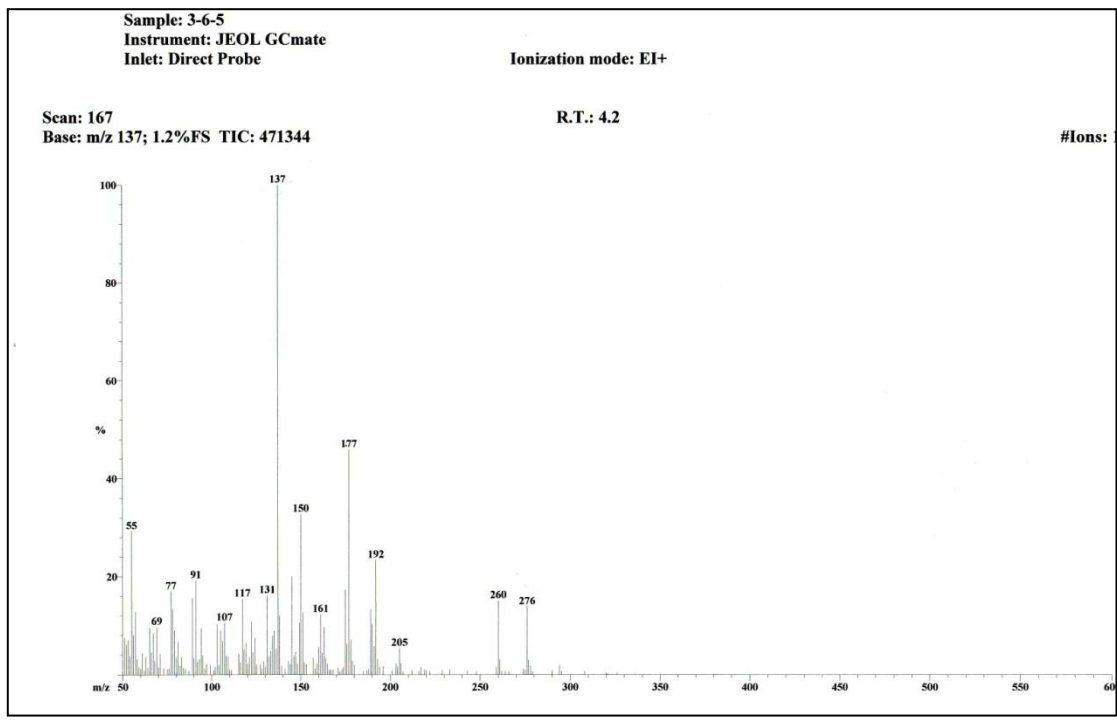

**EI-MS of compound 3**
